# Supplementary material for: Genetic susceptibility to bone and soft tissue sarcomas: a field synopsis and meta-analysis
Source: PubMed Central journal article supplement (PMC5915097; doi:10.18632/oncotarget.24719), 2018-04-06
Supplement: oncotarget-09-18607-s001.pdf [file oncotarget-09-18607-s001.pdf]

## **Genetic susceptibility to bone and soft tissue sarcomas: a field synopsis and meta-analysis**

### **SUPPLEMENTARY MATERIALS**

**Supplementary Table 1: Polymorphisms characteristics. In blue: variation analyzed by different Authors in different datasets**

See Supplementary File 1

**Supplementary Table 2: Meta-analysis results**

See Supplementary File 2

**Supplementary Table 3: Polymorphisms rs IDs for variations defined in the original papers (abstract or text) with the only nucleotide change or Aminoacid change**

See Supplementary File 3
